# Supplementary material
Source: PubMed Central journal article supplement (PMC8832642)
Supplement: 12882_2022_2681_MOESM1_ESM.pdf [file 12882_2022_2681_MOESM1_ESM.pdf]

**Supplementary Table 1. Initial Hospital-related Associations with SARS-CoV2 -related AKI.**

|                                                | <b>Total</b> | <b>No AKI</b>      | <b>AKI (total)</b> |
|------------------------------------------------|--------------|--------------------|--------------------|
|                                                | <b>6874</b>  | <b>4155 (60.5)</b> | <b>2719 (39.6)</b> |
| Co-infections                                  |              |                    |                    |
| Bacterial (blood, sputum, urine)               | 1092 (16)    | 474 (11)           | 618 (23)           |
| Respiratory viral                              | 54 (0.8)     | 36 (0.9)           | 18 (0.7)           |
| Initial PRISM score, median (IQR) <sup>a</sup> | 7 (4, 11)    | 5.5 (1, 10)        | 9 (5, 14)          |
| Baseline SOFA score, median (IQR) <sup>a</sup> | 2 (0, 5)     | 1 (0, 3)           | 4 (2, 7)           |
| Max SOFA score, median (IQR) <sup>a</sup>      | 4 (1, 7)     | 2 (0, 5)           | 6 (3, 10)          |
| Blood Type                                     |              |                    |                    |
| Group O                                        | 779 (11)     | 417 (10)           | 362 (13)           |
| Group A                                        | 721 (11)     | 411 (10)           | 310 (11)           |
| Group B                                        | 378 (6)      | 251 (6)            | 127 (5)            |
| Group AB                                       | 170 (3)      | 124 (3)            | 46 (2)             |
| Unknown                                        | 4826 (70)    | 2952 (71)          | 1874 (69)          |
| Medications/Infusions                          |              |                    |                    |
| Steroids                                       | 2312 (34)    | 1397 (34)          | 915 (34)           |
| Remdesivir                                     | 1121 (16)    | 806 (19)           | 315 (12)           |
| Azithromycin                                   | 2399 (35)    | 1438 (35)          | 961 (35)           |
| Aspirin                                        | 158 (2)      | 64 (2)             | 94 (4)             |
| IVIg                                           | 142 (2)      | 72 (2)             | 70 (3)             |
| Convalescent plasma                            | 268 (4)      | 144 (4)            | 124 (5)            |
| Packed red blood cells                         | 174 (3)      | 55 (1)             | 119 (4)            |
| ACE-I/ARBs                                     | 281 (4)      | 163 (4)            | 118 (4)            |
| Diuretics                                      | 1369 (20)    | 593 (14)           | 776 (29)           |
| NSAIDs                                         | 87 (1)       | 62 (2)             | 25 (0.9)           |
| Iohexol contrast                               | 1719 (25)    | 1115 (27)          | 604 (22)           |

These therapies or complications occur within the first 7 days of hospitalization when SARS-CoV2-related AKI is defined. Data presented as number (column percentiles), except where specified. ACE-I=angiotensin-converting enzyme-inhibitors; AKI=acute kidney injury; ARB=angiotensin receptor blockers; IVIG=intravenous immunoglobulin; NSAID=non-steroidal anti-inflammatory drugs; PRISM=Pediatric Risk of Mortality Score; SOFA=Sequential Organ Failure Assessment.

<sup>a</sup>Initial PRISM score missing for 497 pediatric patients. Baseline SOFA score missing for 2741 adult patients; maximum SOFA score missing for 2016 adult patients.
